1                   **Quantifying the contribution of subject and group factors in brain**  
2                                           **activation**

3  
4           Johan Nakuci<sup>1\*</sup>, Jiwon Yeon<sup>2</sup>, Kai Xue<sup>1</sup>, Ji-Hyun Kim<sup>3</sup>, Sung-Phil Kim<sup>3</sup> and Dobromir  
5                                           Rahnev<sup>1</sup>

6  
7           <sup>1</sup>School of Psychology, Georgia Institute of Technology, Atlanta, Georgia, 30332, USA.

8           <sup>2</sup>Department of Psychology, Stanford University, Stanford, California, 94305, USA.  
9           California, 94305, USA.

10          <sup>3</sup>Department of Biomedical Engineering, Ulsan National Institute of Science and  
11          Technology, Ulsan, South Korea.

12

13          \* **Email:** [jnakuci@gmail.com](mailto:jnakuci@gmail.com)

14

15          **Keywords:** individual differences, fMRI, perceptual decision-making, brain-behavior  
16          relation

17

18          **Acknowledgments**

19          This work was supported by the National Institutes of Health (grant R01MH119189 to  
20          DR) and the Office of Naval Research (grant N00014-20-1-2622 to DR).

21

22          **Competing interests:** Authors declare that they have no competing interests.

23

24          **Author contributions:**

25          Conceptualization: JN, DR; Methodology: JN, JY, KX, DR; Data Curation: JY, JHK,  
26          SPK; Visualization: JN, DR; Funding acquisition: DR; Writing – original draft: JN, DR;  
27          Writing – review & editing: JN, JY, KX, JHK, SPK, DR

28 **Abstract**

29 Research in neuroscience often assumes universal neural mechanisms, but increasing  
30 evidence points towards sizeable individual differences in brain activations. What  
31 remains unclear is the extent of the idiosyncrasy and whether different types of analyses  
32 are associated with different levels of idiosyncrasy. Here we develop a new method for  
33 addressing these questions. The method consists of computing the within-subject  
34 reliability and subject-to-group similarity of brain activations and submitting these values  
35 to a computational model that quantifies the relative strength of group- and subject-level  
36 factors. We apply this method to a perceptual decision-making task (N=50) and find that  
37 activations related to task, reaction time (RT), and confidence are influenced equally  
38 strongly by group- and subject-level factors. Both group- and subject-level factors are  
39 dwarfed by a noise factor, though higher levels of smoothing increases their contributions  
40 relative to noise. Overall, our method allows for the quantification of group- and subject-  
41 level factors of brain activations and thus provides a more detailed understanding of the  
42 idiosyncrasy levels in brain activations.

## 43 **Introduction**

44 Human behavior is idiosyncratic: what elicits a certain behavior in one person is often  
45 very different from what elicits that same behavior in another (Eilam 2015; Forkosh et al.  
46 2019). Similarly, increasing amount of evidence points towards the existence of  
47 substantial idiosyncrasy in brain activations, such that the same task can elicit different  
48 patterns of activity in different subjects (Seghier et al. 2008; Miller et al. 2009, 2012).  
49 Yet, it remains unclear how to precisely quantify the strength of the observed  
50 idiosyncrasy, as well as whether different types of analyses are associated with different  
51 levels of idiosyncrasy.

52  
53 To address these questions, here we develop a method to determine the contribution of  
54 group- and subject-level factors to observed activations in functional MRI (fMRI)  
55 studies. The method requires the computation of subject-to-group similarity and within-  
56 subject reliability of the observed activations. The idea is that the subject-to-group  
57 similarity can inform us about how different each person's activation map is from the  
58 group. However, this information has to be interpreted in the context of the noisiness of  
59 each individual map, which can be quantified by assessing its within-subject reliability.  
60 Critically, these values can be submitted to a computational model that can assess the  
61 relative contribution of group- and subject-level factors to each activation map.

62  
63 We collected data from a perceptual decision-making task inside an MRI scanner where  
64 subjects ( $N = 50$ ) judged whether a briefly presented display featured more red or blue  
65 dots and provided a confidence rating (**Fig. 1A**). The experiment was organized in 96  
66 blocks of 8 trials each (see Materials and Methods for full details). We performed  
67 standard analyses to assess the activation maps associated with task trials, as well as with  
68 RT and confidence (by comparing trials with higher- vs. lower than the trial-level median  
69 RT and confidence). We show that the model can successfully quantify the contribution  
70 of group- and subject-level factors to brain activations and that these two factors are  
71 approximately equally important in our task.

72

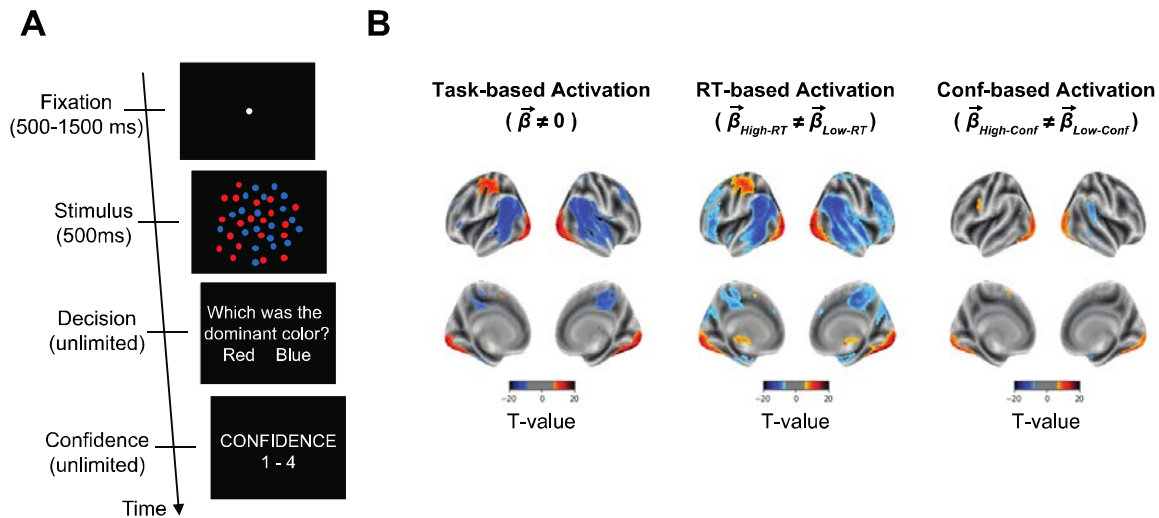

73

74 **Figure 1. Task and results of standard group analyses.** (A) Task. Subjects performed a  
75 simple perceptual decision-making task that required them to judge the dominant color in  
76 a display of colored dots and rate their confidence. (B) Results of standard second  
77 analyses for task-, RT-, and confidence-based contrasts. The analyses showed strong  
78 increases and decreases in activation across a range of brain regions for task- (top left),  
79 RT- (top middle) and confidence-based (top right) analyses. All maps thresholded at FDR  
80 < 0.01 corrected for display purposes.

81

## 82 **Materials and Methods**

### 83 Subjects

84 Fifty-two healthy subjects were recruited for this study. Two subjects were excluded  
85 because one had metal braces in their teeth and one decided to stop the experiment after  
86 the second run. All analyses were thus based on the remaining 50 subjects (25 females;  
87 Mean age = 26; Age range = 19-40; Compensated 20,000 KRW or approximately 18  
88 USD). All subjects were screened for any history of neurological disorders or MRI  
89 contraindications. The study was approved by Ulsan National Institute of Science and  
90 Technology Review Board (UNISTIRB-20-30-C) and all subjects gave written consent.

91

### 92 Task

93 Subjects had to determine which set of colored dots (red vs. blue) was more frequent in a  
94 cloud of dots (Fig. 1A). Each trial began with a white fixation dot presented for a variable  
95 amount of time between 500-1500 ms at the center of the screen on a black background.  
96 Then, the stimulus was shown for 500 ms, followed by untimed decision and confidence

97 screens. The stimulus consisted of between 140 and 190 red- and blue-colored dots (dot  
98 size = 5 pixels) dispersed randomly inside an imaginary circle with a radius of  $3^\circ$  from  
99 the center of the screen. Four different dot ratios were used – 80/60, 80/70, 100/80, and  
100 100/90, where the two numbers indicate the number of dots from each color. The  
101 experiment was organized in blocks of 8 trials each, with each dot ratio presented twice  
102 in a random order within a block. The more frequent color was pseudo randomized so  
103 that there were equal number of trials where red and blue were the correct answer within  
104 a run (consisting of 16 blocks). Subjects used an MRI-compatible button box with their  
105 right hand to indicate their decision and confidence responses. For the decision response,  
106 the index finger was used to indicate a “red” response and the middle finger for a “blue”  
107 response. Confidence was given on a 4-point scale, where 1 is the lowest and 4 is the  
108 highest, with the rating of 1 mapped to the index finger and the rating of 4 mapped to the  
109 little finger.

110

111 Subjects performed 6 runs each consisting of 16 blocks of 8 trials (for a total of 768 trials  
112 per subject). Three subjects completed only half of the 6<sup>th</sup> run and another three subjects  
113 completed only the first 5 runs due to time constraints. The remaining 44 subjects  
114 completed the full 6 runs. Subjects were given 5 seconds of rest between blocks, and self-  
115 paced breaks between runs.

116

### 117 MRI recording

118 The MRI data was collected on a 64-channel head coil 3T MRI system (Magnetom  
119 Prisma; Siemens). Whole-brain functional data were acquired using a T2\*-weighted  
120 multi-band accelerated imaging (FoV = 200 mm; TR = 2000 ms; TE = 35 ms; multiband  
121 acceleration factor = 3; in-plane acceleration factor = 2; 72 interleaved slices; flip angle =  
122  $90^\circ$ ; voxel size =  $2.0 \times 2.0 \times 2.0 \text{ mm}^3$ ). High-resolution anatomical MP-RAGE data were  
123 acquired using T1-weighted imaging (FoV = 256 mm; TR = 2300 ms; TE = 2.28 ms; 192  
124 slices; flip angle =  $8^\circ$ ; voxel size =  $1.0 \times 1.0 \times 1.0 \text{ mm}^3$ ).

125

### 126 MRI preprocessing and general linear model fitting

127 MRI data were preprocessed with SPM12 (Wellcome Department of Imaging  
128 Neuroscience, London, UK). We first converted the images from DICOM to NIFTI and  
129 removed the first three volumes to allow for scanner equilibration. We then preprocessed  
130 with the following steps: de-spiking, slice-timing correction, realignment, segmentation,  
131 coregistration, normalization, and spatial smoothing with 10 mm full width half  
132 maximum (FWHM) Gaussian kernel. In control analyses, we used 5 and 20 mm FWHM  
133 smoothing to investigate whether the results are due to fine-grained differences in the  
134 activations maps between subjects, given that local differences would be substantially  
135 reduced by larger smoothing kernels. Despiking was done using the 3dDespike function  
136 in AFNI. The preprocessing of the T1-weighted structural images involved skull-  
137 removal, normalization into MNI anatomical standard space, and segmentation into gray  
138 matter, white matter, and cerebral spinal fluid, soft tissues, and air and background.

139

140 We fit a general linear model (GLM) that allowed us to estimate the beta values for each  
141 voxel in the brain. The model consisted of separate boxcar regressors for trials that had  
142 greater or smaller than the median RT or confidence (trial onset was set to the beginning  
143 of fixation and trial offset was set to the confidence response), inter-block rest periods, as  
144 well as linear and squared regressors for six head movement (three translation and three  
145 rotation), five tissue-related regressors (gray matter, white matter, cerebrospinal fluid,  
146 soft tissues, and air and background), and a constant term per run.

147

#### 148 Standard group-level analyses

149 We first performed a standard group analysis by conducting t-tests across all subjects for  
150 each voxel. A task-based analysis compared the obtained beta values with zero to identify  
151 regions of activation and de-activation. Two behavior-based analyses compared the beta  
152 values for trials with faster- vs. slower-than-median average reaction times (RT) and  
153 higher- vs. lower-than-median average confidence. Significance was assessed using  $p <$   
154 0.05 after Bonferroni correction for multiple comparisons. For display purposes, Fig. 1  
155 and Fig. S1 used the more liberal threshold of  $p < 0.001$  uncorrected.

156

157 Within-subject reliability analyses

158 We examined the within-subject reliability of the whole-brain maps produced by the task,  
159 RT, and confidence analyses. To do so, we first re-did each analysis by only using the  
160 odd trials, as well as by only using the even trials. We then compared the similarity  
161 between the maps obtained for odd and even trials using Pearson correlation. We  
162 performed the analysis five times based on the top 10, 25, 50, 75, or 100% of most  
163 strongly activated voxels in the following way. We first identified the X% most strongly  
164 activated voxels (i.e., the voxels with highest absolute activation values) when only  
165 examining the data from the odd trials. The activation values used were the average beta  
166 value for task-based analyses, and the t-value (obtained by using a t-test to compare the  
167 beta values for trials with above- vs. below-median RT or confidence) for the RT and  
168 confidence analyses. This selection procedure ensured that both positively and negatively  
169 activated voxels were selected and that an equal number of voxels were selected each  
170 time. The activations in the selected top X% of voxels from the odd trials were then  
171 correlated with the activations in the same voxels in the even trials, thus obtaining an  
172 “odd-to-even” correlation value. Then, using an equivalent procedure, we identified the  
173 top X% of most activated voxels in the even trials, and correlated their activations with  
174 the activations in the corresponding voxels in the odd trials, thus obtaining an “even-to-  
175 odd” correlation value. Finally, we computed the overall within-subject reliability as the  
176 average of the odd-to-even and even-to-odd correlation values.

177

178 We limited our analysis to a single session because the objective was to develop a  
179 method that estimate the contribution of subject- and group-level factors in brain  
180 activation using reliability and similarity values. The framework developed here can be  
181 extended to include data from multiple sessions but the benefit using a single session is  
182 that it will maximize within-session reliability since the reliability between sessions could  
183 be affected by multiple exogenous factors (Poldrack et al. 2015; Nakuci et al. 2023).

184

185 Subject-to-group similarity analyses

186 Critically, we examined the subject-to-group similarity in the maps produced by each  
187 analysis. For each subject, we correlated their individual task-, RT-, and confidence-  
188 based activation maps with the corresponding group map obtained by averaging the maps  
189 of the remaining 49 subjects. Similar to the within-subject reliability analyses, we  
190 conducted these analyses separately for the top 10, 25, 50, 75, or 100% of most activated  
191 voxels. These voxels were selected in the same way as for the within-subject reliability  
192 analyses using all of the data in a given subject; the activations in the voxels identified for  
193 a given subject were then correlated with the average activations in the same voxels for  
194 the remaining 49 subjects.

195

#### 196 Consistency in activation analysis

197 As another test of the across-subject similarity, we computed the consistency in the sign  
198 of activation. Our main analyses relied on taking correlations, but it is possible that just  
199 considering the sign of activation (rather than the strength of activation) would produce  
200 different results. To investigate this possibility, we examined the consistency of the sign  
201 of voxel activations (positive or negative) across subjects. To do so, we first set all voxels  
202 values that were equal to zero to not-a-number value (NaN). This applied to regions that  
203 are outside the brain. We then binarized the voxel activation values  $activation_i$  such  
204 that:

205

$$binary_i = \begin{cases} 1, & activation_i \geq 0 \\ 0, & activation_i < 0 \end{cases}$$

206

207 The consistency of the sign of a voxel's activation across subjects ( $C_i$ ) was then  
208 calculated as percentage of subjects for which a voxel  $i$  was positively or negatively  
209 activated using the formula:

210

$$C_i = 100 \times \frac{1}{50} \sum_{i=1}^{50} binary_i$$

211



212 As defined,  $C_i$  goes from 0 (all subjects having negative activation for that voxel) to 100  
213 (all subjects having positive activations for that voxel), with a value of 50 indicating that  
214 half of the subjects had positive and half had negative activation. However, when  
215 reporting the values of  $C_i$ , we flipped values under 50 using the formula  $C_{i,flipped} =$   
216  $100 - C_i$ , so that these values represent the percent of subjects with negative activations.  
217 The analysis was performed separately for task-based activation maps, RT-based  
218 activation maps, and confidence-based activation maps. The activation values were the  
219 average beta value (for task-based analyses) or t-value (for RT and confidence analyses).

220

221 Low across-subject similarity in these analyses would result in most voxels having  
222 consistency,  $C_i$ , values close to 50 (corresponding to the voxel activation having positive  
223 sign in half the subjects and negative sign in the other half). However, due to chance, the  
224 consistency values are bound to sometimes be higher. Therefore, to enable the  
225 appropriate interpretation of the obtained results, we computed the expected consistency  
226 values in the maps of 50 subjects whose maps have no relationship to each other.  
227 Specifically, we generated a random set of voxel activation values for each of 50 sample  
228 subjects. Maximal consistency from the random data was calculated in the same manner  
229 as the empirical values and the procedure was repeated 1000 times. This analysis  
230 revealed that completely random data would produce a maximal consistency of 80% (for  
231 both positive and negative activations) given the number of voxels and number of  
232 subjects that we had, which was close to the empirically observed values for RT and  
233 confidence analyses.

234

### 235 Distribution of top-10% most strongly activated voxels

236 As a final test of the across-subject similarity for the different maps, we sought to identify  
237 the consistency of the location of the most strongly activated brain regions across  
238 subjects. For each subject, we selected the top-10% most strongly activated voxels by  
239 considering the absolute value of either the average beta value (for task-based analyses)  
240 or t-value (for RT and confidence analyses). Note that this procedure selected positive  
241 and negative activations. We then estimated, for each voxel, the percent of subjects for

242 which the voxel was selected as one of the top-10% most strongly activated voxels. As  
243 before, the analysis was performed separately for task-based activation maps, RT-based  
244 activation maps, and confidence-based activation maps.

245

246 Low across-subject similarity in these analyses would result in most voxels being  
247 selected about 10% of the time. However, due to chance, some voxels are bound to be  
248 selected more than 10% of the time. Therefore, to enable the appropriate interpretation of  
249 the obtained results, we computed the expected level of maximal overlap in the maps of  
250 50 subjects whose maps have no relationship to each other. Specifically, for each of the  
251 50 subjects, we generated a random set voxel activation values. We then selected the top-  
252 10% of the highest absolute values from each subject and calculated the overlap across  
253 subjects. The expected value from random data was computed as the average maximal  
254 overlap after 1000 iterations. This analysis revealed that completely random data would  
255 produce a maximal overlap of 28% given the number of voxels and number of subjects  
256 that we had, which was only a little less than the empirically observed values for RT and  
257 confidence analyses (32% for RT-based analyses and 30% for confidence-based  
258 analyses).

259

### 260 Model specification

261 The model jointly generates behavior and brain activity maps using minimal assumptions  
262 in a way that makes it generalizable across different contexts. The model assumes that the  
263 activation map for each trial is a function of seven different factors. The first three are  
264 group-level factors (i.e., factors common to all subjects) for the task itself, the influence  
265 of RT, and the influence of confidence. The next three factors are subject-level factors  
266 (i.e., factors specific to each subject) for the task itself, the influence of RT, and the  
267 influence of confidence. Finally, the 7<sup>th</sup> factor is simply Gaussian noise. Critically, each  
268 factor is weighed by a corresponding factor weight that determines the strength of  
269 influence of that factor to the final voxel activation values, such that the activation  
270 strength ( $\beta$ ) for a given voxel on a given trial is:

271

$$\begin{aligned} \beta = & w_{task_{group}} * f_{task_{group}} + w_{rt_{group}} * f_{rt_{group}} * RT + w_{conf_{group}} * f_{conf_{group}} * conf \\ & + w_{task_{subj}} * f_{task_{subj}} + w_{rt_{subj}} * f_{rt_{subj}} * RT + w_{conf_{subj}} * f_{conf_{subj}} \\ & * conf + w_{noise} * f_{noise} \end{aligned}$$

272

273 where  $RT$  and  $conf$  are the empirical the reaction time and confidence trial, the  $w$ 's are  
274 the weights associated with each factor, and the  $f$ 's are the factors that influence the  
275 voxel activity for a given trial. Without loss of generality, the weight of the noise factor  
276 ( $w_{noise}$ ) was fixed to 1. The  $f$  variables are the component of activation that influence  
277 the voxel activity for a given trial and  $f$  can be thought of as the latent (unobserved)  
278 component of activation that is associated with the task, RT, confidence, and noise. The  
279 value of each factor  $f$  was randomly sampled from a standard normal distribution such  
280 that group-level factors were randomly sampled for each voxel, subject-level factors were  
281 randomly sampled for each voxel and subject, and the noise factor was randomly sampled  
282 for each voxel, subject, and trial. We note that the model does not predict beta values for  
283 individual regressors. Instead, it generates beta values that already take into account all  
284 regressors, which are then used to compute subject-to-group similarity and within-subject  
285 reliability values.

286

287 The advantage of a model-based approach is that (1) it provides the ratio of subject to  
288 group level contribution and (2) it allows us to compare the contribution of subject- and  
289 group-level factors relative to the noise in the data. Alternatively, the ratio can be  
290 calculated directly from the within-subject reliability and subject-to-group similarity, but  
291 the advantage of the model is that it allows us to compare the group- and subject-level  
292 factors to the noise level. Therefore, a model-based approach allows for a more thorough  
293 analysis of the contribution of subject- and group-level factors to the brain activation.

294

### 295 Model fitting

296 We first fit the model to the empirically observed within-subject reliability and subject-  
297 to-group similarity values. The model had six free parameters corresponding to the  
298 weights,  $w$ , of the group- and subject-level factors that determined the simulated  $\beta$  value

299 for each voxel in each trial. For a given set of weights, we simulated a complete  
300 experimental dataset by generating simulated data for 50 subjects with 768 trials per  
301 subjects. Based on these data, we then computed the within-subject reliability and  
302 subject-to-group similarity values in the same way as for the empirical data. When  
303 simulating the model, we observed that the exact number of voxels used made no  
304 systematic difference to the observed values of the obtained within-subject reliability and  
305 subject-to-group similarity values. Therefore, we used 10,000 voxels, which allowed for  
306 stable values to be obtained on different iterations. The fitting minimized the mean  
307 squared error (MSE) between the simulated and empirically observed within-subject  
308 reliability and subject-to-group similarity values calculated using the top-100% most  
309 activated voxels (that is, using all voxels). Once the fitting was completed, we also  
310 generated the predictions of the best-fitting model for the within-subject reliability and  
311 subject-to-group similarity values calculated using the top 10, 25, 50, and 75% most  
312 activated voxels. The fitting itself was carried out using the Bayesian Adaptive Direct  
313 Search (BADs) toolbox (Acerbi and Ma 2017). We fit the model 10 times are reported  
314 the best fitting model among the 10 iterations. We repeated the model fitting 10x to avoid  
315 local minima when estimating parameters, as is standard practice in the field and our  
316 laboratory (Shekhar and Rahnev 2020; Yeon and Rahnev 2020).

317

### 318 Model Comparison

319 We have compared the Full model (Subject + Group + Noise factors) with a Subject-  
320 Only model (Subject + Noise factors) and Group-Only model (Group + Noise factors).  
321 We simulated each model 25x and calculated the mean-squared error (MSE) between the  
322 model-based and empirical values for the subject-to-group similarity and within-subject  
323 reliability values. In addition, we compared the different models using Akaike  
324 Information Criterion (AIC) and Bayesian Information Criterion (BIC).

325

### 326 Data and code availability

327 Processed data and code are available at <https://osf.io/gyw8f/>.

328

## 329 **Results**

330 We first performed standard group fMRI analyses by conducting t-tests across all  
331 subjects for each voxel. We found that contrasts related to the task (Task > Background),  
332 RT (Fast RT > Slow RT), and confidence (High confidence > Low confidence) all  
333 produced regions of strong activation and de-activation (**Fig. 1B**). We inspected the  
334 activations for task, RT, and confidence in subjects 1-3 and found that all three subjects  
335 demonstrated relatively consistent activation patterns (**Fig. 2**). However, there appeared  
336 to be consistent across-subject differences in the activation maps, which could not be  
337 attributed purely to noise as they also appeared in maps produced by only the odd or only  
338 the event trials for a given subject. These results hint at the idea that both group- and  
339 subject-level factors may be contributing to the observed activations.

340

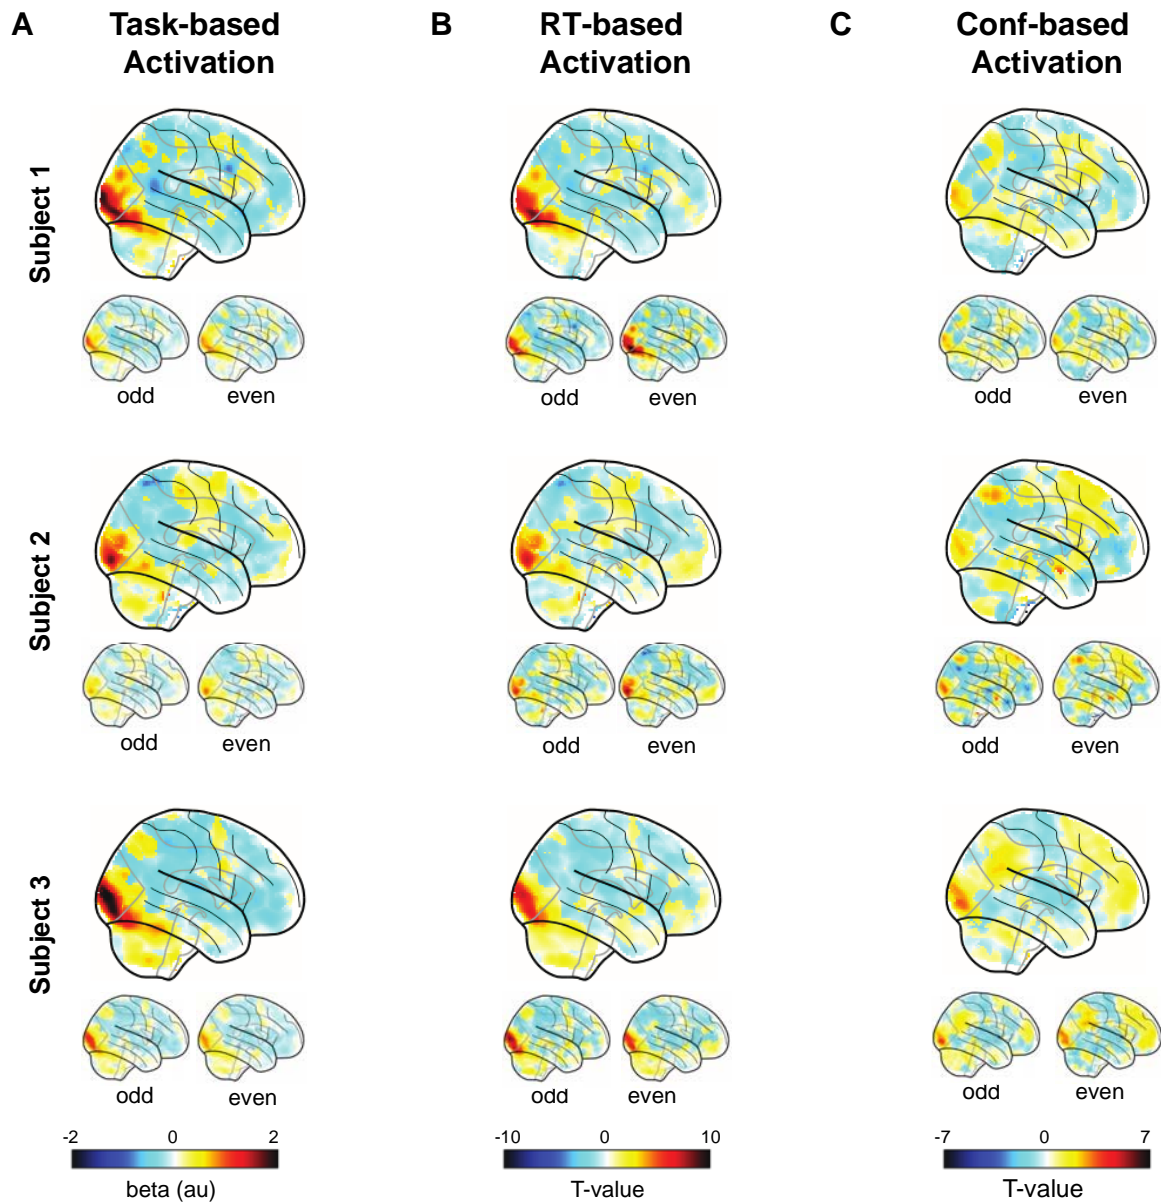

341

342

343 **Figure 2. Trial-level activations for task, RT, and confidence for three example**  
344 **subjects.** Trial-level activation maps for (A) task, (B) RT, and (C) confidence  
345 contrasts from the first three subjects. Small brains underneath represent the same contrasts  
346 conducted only on odd or even trials. Similar activations for all three subjects appear for  
347 all trial-level contrasts.  
348

349 To formally test these impressions, we first examined both the within-subject reliability  
350 and subject-to-group similarity of the whole-brain maps for the task, RT, and confidence  
351 contrasts. We computed within-subject reliability by performing Pearson correlations

352 between the activations obtained when examining only the odd or only the even trials.  
353 We computed subject-to-group similarity by correlating each subject's brain map with  
354 the group map obtained by averaging the maps of the remaining 49 subjects.  
355  
356 As may be expected from Figure 2, for task-based activation we found strong within-  
357 subject reliability ( $r_{\text{act}} = 0.81 \pm 0.013$ ,  $p < 0.001$ ) and subject-to-group similarity in task  
358 activations ( $r_{\text{act}} = 0.72 \pm 0.013$ ,  $p < 0.001$ ; **Fig. 3A**). In the same manner, RT- and  
359 confidence-based maps exhibit strong within-subject reliability ( $r_{\text{rt}} = 0.74 \pm 0.014$ ,  $p <$   
360  $0.001$ ;  $r_{\text{conf}} = 0.55 \pm 0.028$ ,  $p < 0.001$ ; **Fig. 3B-C, top**). Critically, we examined the  
361 subject-to-group similarity for the RT and confidence maps. Echoing the qualitative  
362 impressions from Figure 2, we found a high degree of similarity across subjects for the  
363 RT-based maps ( $r_{\text{rt}} = 0.69 \pm 0.014$ ,  $p < 0.001$ ; **Fig. 3B, bottom**) and confidence-based  
364 maps ( $r_{\text{conf}} = 0.52 \pm 0.025$ ; **Fig. 3C, bottom**).  
365

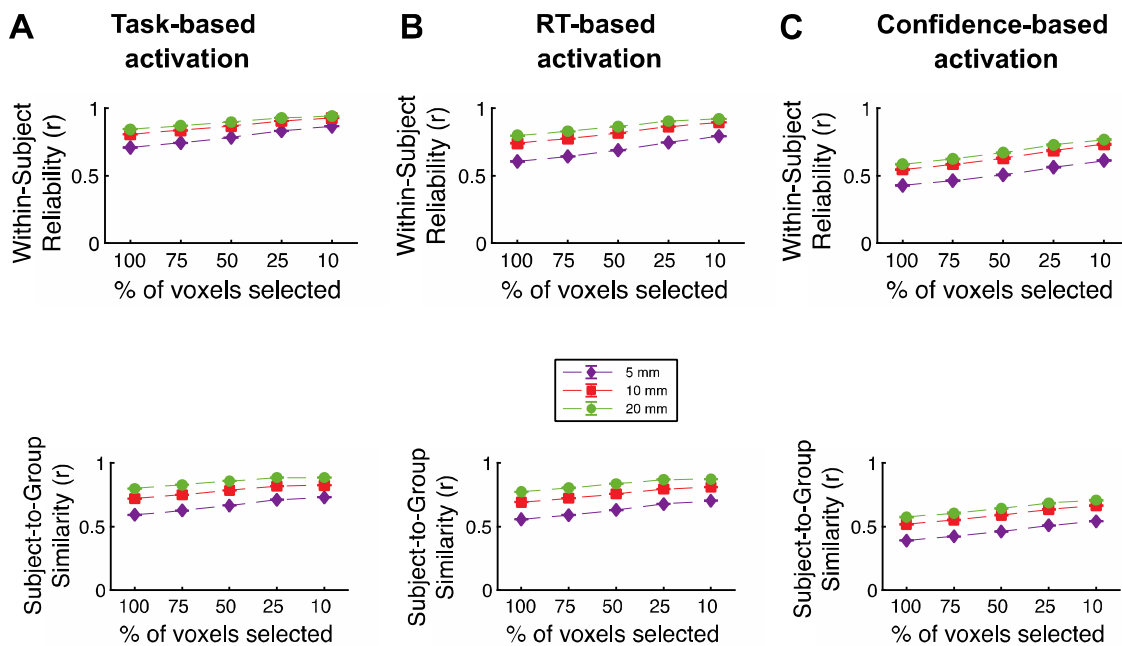

366  
367 **Figure 3. Within-subject reliability and subject-to-group similarity.** Within-subject  
368 reliability and subject-to-group similarity values as a function of the percent of most  
369 activated voxels selected for (A) task- (B) RT- and (C) confidence-based activation.  
370 Subject-to-group similarity is computed as the average similarity between the maps of  
371 each person and the group map of the remaining subject. Error bars show SEM.



372

373 One potential concern with these types of analyses could be that they may be biased by  
374 voxels that are either particularly noisy or not involved in the task in any way. Therefore,  
375 to test whether these results are robust, we repeated them by first selecting the top 75, 50,  
376 25, or 10% of the most strongly activated voxels for each subject (see Methods). These  
377 analyses showed that selecting smaller percentages of the most highly activated voxels  
378 generally increased both the within-subject reliability and subject-to-group similarity, but  
379 the pattern of results remained essentially unchanged.

380

381 To gain further intuition for the underlying effects, we conducted two additional analyses.  
382 First, we tested the consistency of the sign of voxel activations (whether they were  
383 positive or negative) across subjects. We found that for the task maps, there were large  
384 portions of the brain that showed consistently positive or consistently negative activations  
385 (**Fig. 4A left**). Indeed, the maximal overlap across subjects was 100% for both positive  
386 and negative activations. Further, we found many areas of strong consistency with  
387 maximal overlap of 100% and 98% for positive and negative activations in the RT maps,  
388 and maximal overlap of 100% and 88% for positive and negative activations in the  
389 confidence maps (**Fig. 4A middle and right**). (Note that the expected values in random  
390 data are 80% for positive and negative activations)

391



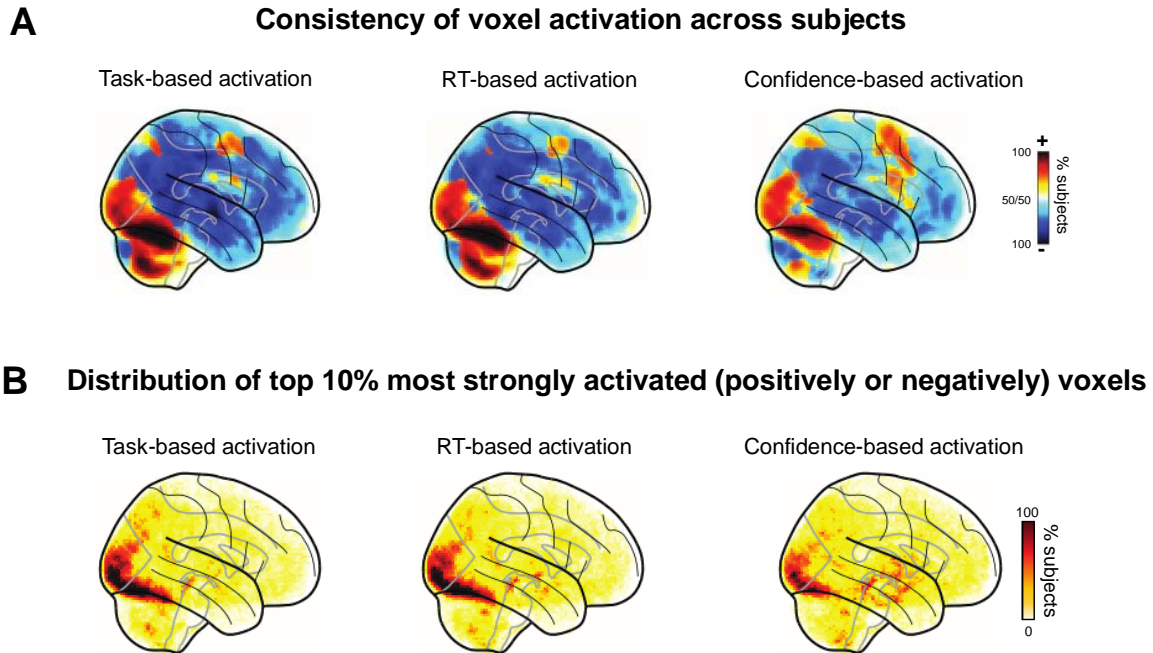

392

393 **Figure 4. Maps of the activation consistency and distribution of the top-10% most**  
394 **activated voxels across subjects.** (A) Maps of voxel consistency computed as the  
395 proportion of subjects showing a positive or negative relationship between voxel activity  
396 and behavior. Task activations maps, as well as RT and confidence maps show a high  
397 level of consistency. (B) Maps of the distribution of the top-10% most activated voxels.  
398 Task activations maps, as well as RT and confidence maps contain areas with a high level  
399 of consistency in occipital and parietal lobes.

400

401 Second, we examined the distribution of the locations of the top-10% most strongly  
402 activated voxels for each subject (both positive and negative activations were  
403 considered). The most strongly activated voxels clustered in the occipital and parietal  
404 lobes (**Fig. 4B left**). The maximum overlap among the 10% most activated voxels across  
405 subjects was 98%. Further, there were again areas of strong clustering of the most  
406 activated voxels (mostly in the occipital lobe) for both RT and confidence maps  
407 (maximal overlap: 98% and 78%, respectively; **Fig. 4B middle and right**). Altogether,  
408 both additional analyses further underscore the high level of consistency for task, RT and  
409 confidence maps across subjects. We also repeated the same analyses above with a wide  
410 range of smoothing levels (from 5 to 20 mm) and obtained very similar results (**Fig. S1**  
411 **and S2**).

412

413 Having quantified the within-subject reliability and subject-to-group similarity between  
414 different types of analyses, we used this information to quantify the contribution of  
415 group- and subject-level factor by building a simple computational model. The critical  
416 idea behind the model is to separately model group-level factors (i.e., factors that are  
417 identical for all subjects) and subject-level factors (i.e., factors that are different for each  
418 subject). The inputs into the model are the empirical within-subject reliability and  
419 subject-to-group similarity values, as well as the empirical RT and confidence values.  
420 The simulation generates idealized beta values (voxel activations) for each trial  
421 characterized by a given RT and confidence values. Note that the activations produced by  
422 the model are not mapped onto specific voxels in the brain and do not form a meaningful  
423 spatial map. That is, to keep the model simple, individual voxel activation for each  
424 group- and task-level factor were generated randomly by ignoring known temporal and  
425 inter-regional dependencies.  
426  
427 Critically, the model produces the idealized beta values based on three group-level  
428 factors (group task map, group RT map, and group confidence map), three subject-level  
429 factors (subject-specific task map, subject-specific RT map, and subject-specific  
430 confidence map), and one noise factor (**Fig. 5A**). The weight of the noise factor was fixed  
431 to 1, leaving the model with a total of six free parameters (one for the weight of each  
432 group- and subject-level factor). We then fit the within-subject reliability and subject-to-  
433 group similarity produced by the model to the observed values computed using 100% of  
434 the voxels.

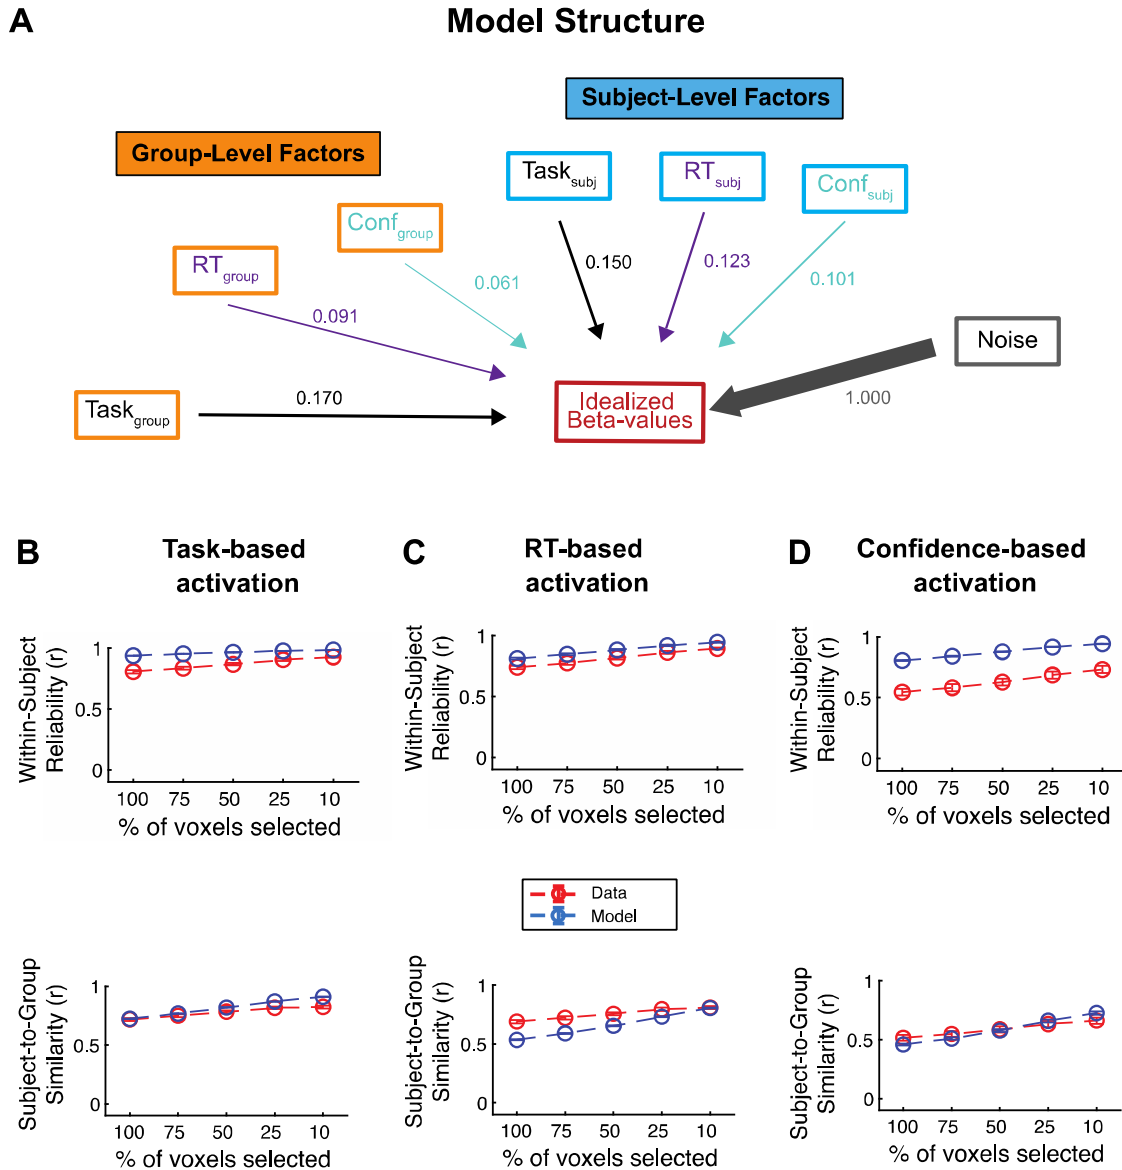

435

436 **Figure 5. Model structure and model fits.** (A) Graphical depiction of the model at the  
 437 trial level. The model generates an idealized set of beta values for an individual trial as  
 438 the confluence of three group-level, three subject-level, and one noise factor. The  
 439 thickness of the arrows and associated numbers correspond to the weights obtained from  
 440 fitting the model to the data. (B-C) Model fits to the within-subject reliability (*top*) and  
 441 subject-to-group similarity (*bottom*) values for (B) task, (C) RT, and (D) confidence  
 442 analyses. The model was fit only to the empirical data with 10-mm smoothing where  
 443 100% of voxels selected. Despite its simplicity, the model is able to reproduce the  
 444 empirical data for the remaining analyses with smaller percentages of selected voxels  
 445 very well.

446

447 Despite its simplicity, the model was able to provide excellent fit to the data from **Fig. 3**  
 448 by capturing closely the observed patterns of within-subject reliability (**Fig. 5B-D, top**)  
 449 and subject-to-group similarity (**Fig. 5B-C, bottom**) for the data with 10 mm smoothing.  
 450 We also separately fit the data with 5 and 20 mm smoothing and obtained equally good  
 451 fits.  
 452  
 453 Critically, the model allowed us to examine the weights of the group- and subject-level  
 454 factors, thus providing insight into the relative contribution of each. We found slightly  
 455 larger contribution weights for the group- than subject-level task factors (subject-level  
 456 factor weight = 0.150, group-level factor weight = 0.170, ratio = 0.88; **Fig. 6A, B**). Thus,  
 457 the group-level factors were only slightly higher than the subject-level factors, pointing to  
 458 a balance between influences that are common across all subjects and influences that are  
 459 specific to each individual. On the other hand, we observed slightly higher relative  
 460 weights for the subject-level factors for the RT and confidence maps at the trial level  
 461 (RT: subject-level factor weight = 0.123, group-level factor weight = 0.091, ratio = 1.35;  
 462 Confidence: subject-level factor weight = 0.101, group-level factor weight = 0.061, ratio  
 463 = 1.65). In other words, our model suggests that group- and subject-level factors have  
 464 relatively similar influence on task activation maps, which corresponds well to recent  
 465 findings about group- and subject-level influences on brain connectivity (Gratton et al.  
 466 2018). However, the relative contribution of all group- and subject-level factors is small  
 467 relative to the contribution of noise (**Fig. 6C**).  
 468

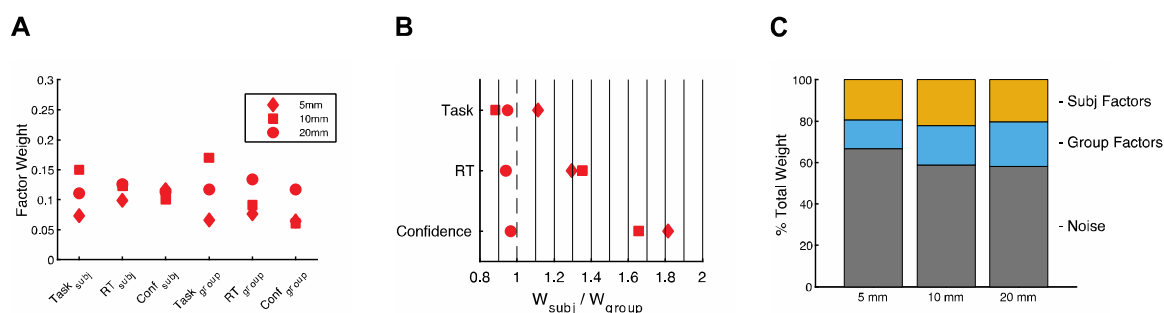

469

470 **Figure 6. Model weights, ratios, and proportions.** A) Model weights. Subject- and  
 471 group-level weights obtained from fitting the model separately to each level of smoothing  
 472 (5, 10, and 20 mm). B) Weight ratios. Relative weights of the subject-level and

473 corresponding group-level factors from each analysis. C) Factor proportions. The  
474 combined percent accounted for by subject, group, and noise factors contributing to the  
475 activation on an individual trial. Subject and group factors reflect the summed task, RT,  
476 and confidence weights.  
477

478 To examine the robustness of the modeling results, we repeated the model fitting on data  
479 with 5 to 20 mm smoothing. These two additional analyses produced similar results: the  
480 weights ratio between the subject- and group-level factors was between 0.8 and 1.21 for  
481 the task factors in all cases, between 0.9 and 1.4 for RT, and between 0.9 and 1.8 for  
482 confidence (**Fig. 6B**).

483

484 Additionally, we compared the Full model (Subject + Group + Noise factors) with a  
485 Subject-Only model (Subject + Noise factors) and a Group-Only model (Group + Noise  
486 factors) (**Fig. S3A-C**). We simulated each model 25x and calculated the mean-squared  
487 error (MSE), Akaike Information Criterion (AIC), and Bayesian Information Criterion  
488 (BIC) between the model-based and empirical within-subject reliability and subject-to-  
489 group similarity values. The reliability and similarity values estimated from the Full  
490 model exhibited lower MSE, AIC and BIC values compared to the Subject-Only or  
491 Group-Only models (paired sample t-test,  $p < 10^{-26}$ ; **Fig. S3D-F**). These results indicate  
492 that there are both subject and group components in both task- and behavior-based brain  
493 activation maps.

494

495 Lastly, we explored whether we would obtain similar results if we repeat these analyses  
496 at the level of blocks (of eight trials each) rather than trials. Similar to the trial-level  
497 analyses, we found relatively high subject-to-group similarity and within-subject  
498 reliability values for task activations. However, analyses of average RT and confidence  
499 on the block level revealed very low subject-to-group similarity values but reasonably  
500 high within-subject reliabilities, which was reflected in much higher values for subject-  
501 compared to group-level factors in our model (**Fig. S4-S8**). These results suggest that  
502 other types of analyses than the standard ones included here may result in different  
503 contributions of subject- and group-level factors.

504

## 505 **Discussion**

506 A major goal of neuroscience research has been to understand the neural correlates of  
507 behavior. Behavior is a complex phenomenon that is often specific to a person (Eilam  
508 2015; Forkosh et al. 2019). Idiosyncratic behavioral responses are ubiquitous in social  
509 situations (Durlauf 2001), economic decisions (Kable and Glimcher 2007), judgments of  
510 beauty (Martinez et al. 2020), confidence ratings (Navajas et al. 2017), response bias  
511 (Rahnev 2021), and even low-level perception (Afraz et al. 2010). Here we develop a  
512 method to quantify the level of idiosyncrasy in brain activations by estimating the relative  
513 contributions of group- and subject-level factors. By applying this method to a new  
514 dataset where subjects (N=50) completed a perceptual decision-making task, we find that  
515 for standard analyses at the trial level, the influence of subject-level factors is only  
516 slightly stronger than the influence of group-level factors.

517

518 There are at least two important conclusions that one can draw from the current results.  
519 First, across all analyses performed here, subject-level factors were at least as important  
520 as group-level factors. While this effect could be at least partly driven by issues such as  
521 misalignment across different brains, the results were remarkably stable whether they  
522 were computed using 5-, 10-, or 20-mm smoothing. If brain misalignment were the main  
523 source of the observed idiosyncrasy here, one would expect that larger smoothing would  
524 produce different results. These results suggest that idiosyncratic, subject-level factors  
525 may play a large role in observed brain activations. Our findings thus highlight the need  
526 for a renewed focus on investigating the brain-behavior relationship at the level of single  
527 subjects (Gilmore et al. 2021; Gordon and Nelson 2021; Naselaris et al. 2021; Song and  
528 Rosenberg 2021).

529

530 Our current results also suggest novel ways for finding robust biomarkers for various  
531 mental disorders (Kaufmann et al. 2017; Elliott et al. 2018; Li et al. 2020; Parkes et al.  
532 2020). Most research in the field has focused on biomarkers unrelated to behavior such as  
533 functional connectivity patterns at rest (Woodward and Cascio 2015; Drysdale et al.

534 2017). An exciting possibility is that subject-level activations maps for disease-relevant  
535 behaviors could serve as much more powerful biomarkers because of their high reliability  
536 and clear differences among people. Focusing directly on the relationship between one's  
537 behavior and one's brain activations may help to delineate the intricate relationship  
538 between the brain and psychopathology (Gratton et al. 2020). Therefore, subject-level  
539 effects could be crucial to diagnosing and treating different mental illnesses.  
540 Additionally, an analysis that is focused on subject-level variability might be more  
541 informative since between-subject analyses ignore the large degree of within-subject  
542 variability (Fisher et al. 2018; Lebreton et al. 2019).

543

544 It is worth noting that contribution of group- and subject-level factors might change. In  
545 some tasks, the group-level factors might play a larger role, whereas in other tasks the  
546 subject-level factor might play a larger role. These different tasks might be valuable for  
547 isolating the group- and subject-level components of cognitions. Future research should  
548 estimate the contribution of these factors in a wider variety of tasks and contrasts.

549

550 Previous work has utilized mixed-effect modeling to estimate the contribution of subject-  
551 and group-factors (Woolrich et al. 2004; Friston et al. 2005; Chen et al. 2013). This prior  
552 work has relied on estimating these effects directly from the underlying brain activation  
553 patterns associated with given condition. The framework developed here builds upon this  
554 work to simulate brain activation to estimate the contribution of subject- and group-level  
555 factors. In a similar fashion to previous work, the subject-level factors can be thought of  
556 as random effects and the group-level factors as fixed effects.

557

558 Despite the fact that our model is able to fit the data quite well, it is nonetheless important  
559 to highlight the model's limitations. In particular more complex models such as  
560 hierarchical models might perform better. However, we are not able to fit a more  
561 complex model because we are fitting group-level data (e.g., average subject-to-group  
562 similarity values) rather than each individual separately. A second limitation pertains to  
563 whether the observed subject-level effects are stable across multiple sessions. In the



564 current analysis, we used fMRI data from a single session, but fMRI signals are highly  
565 variable between sessions even for the same subject (McGonigle et al. 2000; Zandbelt et  
566 al. 2008). Future studies should utilize multiple sessions to confirm the stability of the  
567 subject-level effects. Third, nearby voxels are known to be related to each other, thus  
568 resulting in substantial spatial autocorrelations in fMRI (Shinn et al. 2023). Our analyses  
569 do not account for such spatial autocorrelations because they do not attempt to generate  
570 voxel-level predictions. Nonetheless, it could be useful for future models to include such  
571 autocorrelations. Fourth, in our analyses we split trials based on the median, but median  
572 split can have undesirable statistical properties. An alternative would be to use parametric  
573 modulation to estimate the relationship between brain activation and RT and confidence.

574

575 In conclusion, we develop a computational model to quantify the contribution of group-  
576 and subject-level factors in activation patterns. Our model suggests that activations  
577 related to task, RT, and confidence in a perceptual decision-making task are influenced  
578 equally strongly by group- and subject-level factors. However, both group- and subject-  
579 level factors are dwarfed by a noise factor. Taken together, our method provides a more  
580 detailed understanding of the idiosyncrasy levels in brain activations.

581



## 582 **References**

- 583 Acerbi L, Ma WJ. 2017. Practical Bayesian Optimization for Model Fitting with  
584 Bayesian Adaptive Direct Search. In *Advances in Neural Information Processing*  
585 *Systems*. 30:1834–1844.
- 586 Afraz A, Pashkam MV, Cavanagh P. 2010. Spatial heterogeneity in the perception of face  
587 and form attributes. *Current Biology*. 20.
- 588 Chen G, Saad ZS, Britton JC, Pine DS, Cox RW. 2013. Linear mixed-effects modeling  
589 approach to fMRI group analysis. *Neuroimage*. 73:176–190.
- 590 Drysdale AT, Grosenick L, Downar J, Dunlop K, Mansouri F, Meng Y, Fetcho RN,  
591 Zebley B, Oathes DJ, Etkin A, Schatzberg AF, Sudheimer K, Keller J, Mayberg HS,  
592 Gunning FM, Alexopoulos GS, Fox MD, Pascual-Leone A, Voss HU, Casey BJ,  
593 Dubin MJ, Liston C. 2017. Resting-state connectivity biomarkers define  
594 neurophysiological subtypes of depression. *Nat Med*. 23:28–38.
- 595 Durlauf SN. 2001. A framework for the study of individual behavior and social  
596 interactions. *Sociol Methodol*. 31.
- 597 Eilam D. 2015. The cognitive roles of behavioral variability: Idiosyncratic acts as the  
598 foundation of identity and as transitional, preparatory, and confirmatory phases.  
599 *Neurosci Biobehav Rev*. 49:55–70.
- 600 Elliott ML, Romer A, Knodt AR, Hariri AR. 2018. A Connectome-wide Functional  
601 Signature of Transdiagnostic Risk for Mental Illness. *Biol Psychiatry*. 84:452–459.
- 602 Fisher AJ, Medaglia JD, Jeronimus BF. 2018. Lack of group-to-individual  
603 generalizability is a threat to human subjects research. *Proc Natl Acad Sci U S A*.  
604 115:6106–6115.
- 605 Forkosh O, Karamihalev S, Roeh S, Alon U, Anpilov S, Touma C, Nussbaumer M,  
606 Flachskamm C, Kaplick PM, Shemesh Y, Chen A. 2019. Identity domains capture  
607 individual differences from across the behavioral repertoire. *Nat Neurosci*. 22:2023–  
608 2028.
- 609 Friston KJ, Stephan KE, Lund TE, Morcom A, Kiebel S. 2005. Mixed-effects and fMRI  
610 studies. *Neuroimage*. 24:244–252.
- 611 Gilmore AW, Nelson SM, McDermott KB. 2021. Precision functional mapping of human  
612 memory systems. *Curr Opin Behav Sci*.
- 613 Gordon EM, Nelson SM. 2021. Three types of individual variation in brain networks  
614 revealed by single-subject functional connectivity analyses. *Curr Opin Behav Sci*.
- 615 Gratton C, Kraus BT, Greene DJ, Gordon EM, Laumann TO, Nelson SM, Dosenbach  
616 NUF, Petersen SE. 2020. Defining Individual-Specific Functional Neuroanatomy for  
617 Precision Psychiatry. *Biol Psychiatry*.
- 618 Gratton C, Laumann TO, Nielsen AN, Greene DJ, Gordon EM, Gilmore AW, Nelson  
619 SM, Coalson RS, Snyder AZ, Schlaggar BL, Dosenbach NUF, Petersen SE. 2018.  
620 Functional Brain Networks Are Dominated by Stable Group and Individual Factors,  
621 Not Cognitive or Daily Variation. *Neuron*.
- 622 Kable JW, Glimcher PW. 2007. The neural correlates of subjective value during  
623 intertemporal choice. *Nat Neurosci*. 10.

- 624 Kaufmann T, Alnæs D, Doan NT, Brandt CL, Andreassen OA, Westlye LT. 2017.  
625 Delayed stabilization and individualization in connectome development are related  
626 to psychiatric disorders. *Nat Neurosci.* 20:513–515.
- 627 Lebreton M, Bavard S, Daunizeau J, Palminteri S. 2019. Assessing inter-individual  
628 differences with task-related functional neuroimaging. *Nat Hum Behav.*
- 629 Li A, Zalesky A, Yue W, Howes O, Yan H, Liu Y, Fan L, Whitaker KJ, Xu K, Rao G, Li  
630 J, Liu S, Wang M, Sun Y, Song M, Li P, Chen J, Chen Y, Wang H, Liu W, Li Z,  
631 Yang Y, Guo H, Wan P, Lv L, Lu L, Yan J, Song Y, Wang H, Zhang H, Wu H,  
632 Ning Y, Du Y, Cheng Y, Xu J, Xu X, Zhang D, Wang X, Jiang T, Liu B. 2020. A  
633 neuroimaging biomarker for striatal dysfunction in schizophrenia. *Nat Med.* 26:558–  
634 565.
- 635 Martinez JE, Funk F, Todorov A. 2020. Quantifying idiosyncratic and shared  
636 contributions to judgment. *Behav Res Methods.* 52.
- 637 McGonigle DJ, Howseman AM, Athwal BS, Friston KJ, Frackowiak RSJ, Holmes AP.  
638 2000. Variability in fMRI: An Examination of Intersession Differences.  
639 *Neuroimage.* 11:708–734.
- 640 Miller MB, Donovan CL, Bennett CM, Aminoff EM, Mayer RE. 2012. Individual  
641 differences in cognitive style and strategy predict similarities in the patterns of brain  
642 activity between individuals. *Neuroimage.*
- 643 Miller MB, Donovan CL, van Horn JD, German E, Sokol-Hessner P, Wolford GL. 2009.  
644 Unique and persistent individual patterns of brain activity across different memory  
645 retrieval tasks. *Neuroimage.*
- 646 Nakuci J, Wasylshyn N, Cieslak M, Elliott JC, Bansal K, Giesbrecht B, Grafton ST,  
647 Vettel JM, Garcia JO, Muldoon SF. 2023. Within-subject reproducibility varies in  
648 multi-modal, longitudinal brain networks. *Sci Rep.* 13:6699.
- 649 Naselaris T, Allen E, Kay K. 2021. Extensive sampling for complete models of  
650 individual brains. *Curr Opin Behav Sci.*
- 651 Navajas J, Hindocha C, Foda H, Keramati M, Latham PE, Bahrami B. 2017. The  
652 idiosyncratic nature of confidence. *Nat Hum Behav.* 1.
- 653 Parkes L, Satterthwaite TD, Bassett DS. 2020. Towards precise resting-state fMRI  
654 biomarkers in psychiatry: synthesizing developments in transdiagnostic research,  
655 dimensional models of psychopathology, and normative neurodevelopment. *Curr*  
656 *Opin Neurobiol.* 65:120–128.
- 657 Poldrack RA, Laumann TO, Koyejo O, Gregory B, Hover A, Chen MY, Gorgolewski KJ,  
658 Luci J, Joo SJ, Boyd RL, Hunicke-Smith S, Simpson ZB, Caven T, Sochat V, Shine  
659 JM, Gordon E, Snyder AZ, Adeyemo B, Petersen SE, Glahn DC, McKay DR, Curran  
660 JE, Göring HHH, Carless MA, Blangero J, Dougherty R, Leemans A, Handwerker  
661 DA, Frick L, Marcotte EM, Mumford JA. 2015. Long-term neural and physiological  
662 phenotyping of a single human. *Nat Commun.*
- 663 Rahnev D. 2021. Response Bias Reflects Individual Differences in Sensory Encoding.  
664 *Psychol Sci.* 32.
- 665 Schaefer A, Kong R, Gordon EM, Laumann TO, Zuo X-N, Holmes AJ, Eickhoff SB,  
666 Yeo BTT. 2018. Local-Global Parcellation of the Human Cerebral Cortex from  
667 Intrinsic Functional Connectivity MRI. *Cerebral Cortex.* 28:3095–3114.

668 Seghier ML, Lee HL, Schofield T, Ellis CL, Price CJ. 2008. Inter-subject variability in  
669 the use of two different neuronal networks for reading aloud familiar words.  
670 *Neuroimage*.  
671 Shekhar M, Rahnev D. 2020. MODELS OF METACOGNITION 1 How do humans give  
672 confidence? A comprehensive comparison of process models of metacognition.  
673 Shinn M, Hu A, Turner L, Noble S, Preller KH, Ji JL, Moujaes F, Achard S, Scheinost D,  
674 Constable RT, Krystal JH, Vollenweider FX, Lee D, Anticevic A, Bullmore ET,  
675 Murray JD. 2023. Functional brain networks reflect spatial and temporal  
676 autocorrelation. *Nat Neurosci*. 26:867–878.  
677 Song H, Rosenberg MD. 2021. Predicting attention across time and contexts with  
678 functional brain connectivity. *Curr Opin Behav Sci*.  
679 Woodward ND, Cascio CJ. 2015. Resting-State Functional Connectivity in Psychiatric  
680 Disorders. *JAMA Psychiatry*. 72:743–744.  
681 Woolrich MW, Behrens TEJ, Beckmann CF, Jenkinson M, Smith SM. 2004. Multilevel  
682 linear modelling for fMRI group analysis using Bayesian inference. *Neuroimage*.  
683 21:1732–1747.  
684 Yeon J, Rahnev D. 2020. The suboptimality of perceptual decision making with multiple  
685 alternatives. *Nat Commun*. 11:3857.  
686 Zandbelt BB, Gladwin TE, Raemaekers M, van Buuren M, Neggens SF, Kahn RS,  
687 Ramsey NF, Vink M. 2008. Within-subject variation in BOLD-fMRI signal changes  
688 across repeated measurements: Quantification and implications for sample size.  
689 *Neuroimage*. 42:196–206.  
690  
691

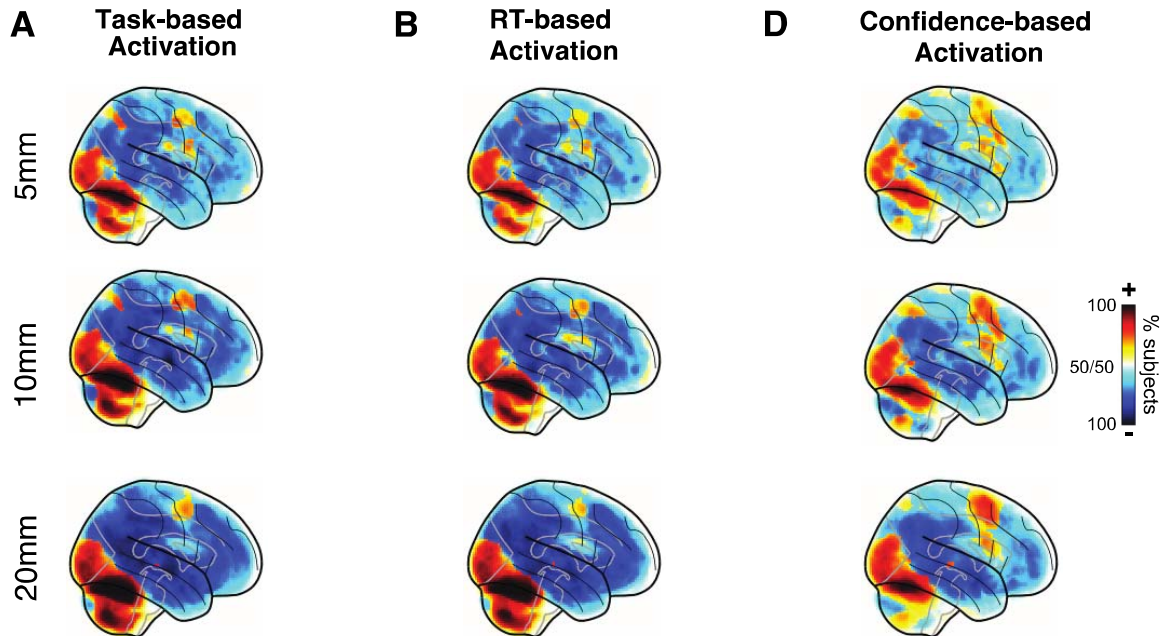

692  
693

694 **Fig. S1. Trial-level analysis maps of voxel activation consistency across subjects.** A)  
695 Task-based activation. B) RT-based activation. C) Confidence-based activation. All maps  
696 exhibited strong areas of consistency. Analysis was conducted on fMRI data smoothed  
697 with 5, 10, and 20 mm FWHM kernels. The 10 mm results are the same as in the main  
698 manuscript and are shown here for comparative purposes. Again, similar results are  
699 obtained for different levels of smoothing.

700

701

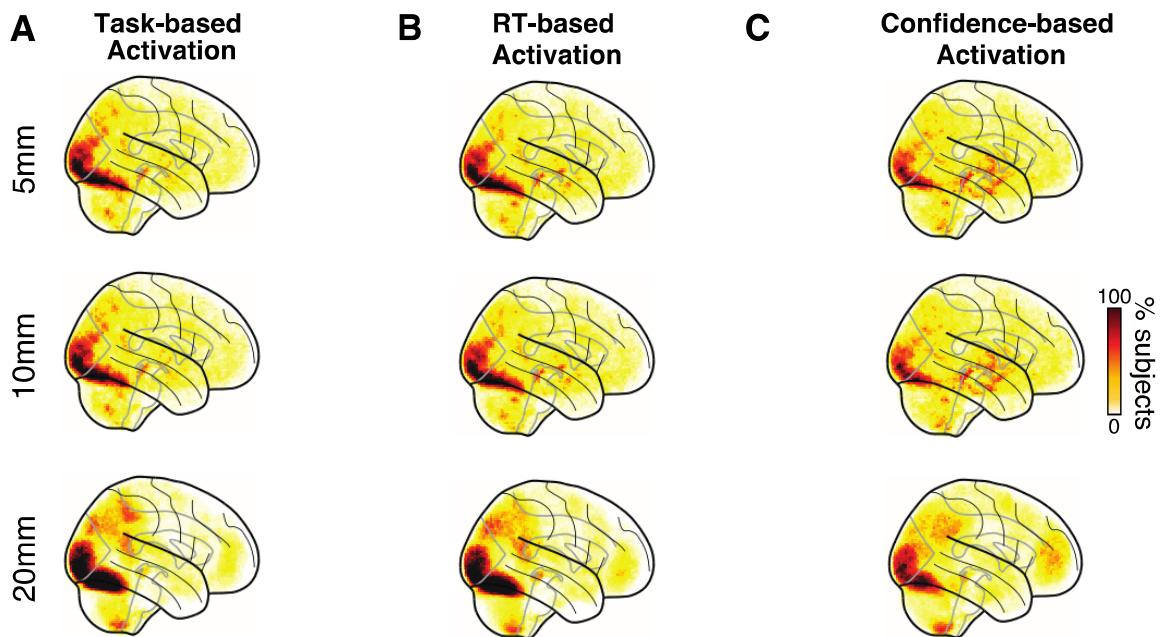

**Fig. S2. Trial-level maps of the distribution of the top-10% most activated voxels.** A) Task-based activation. B) RT-based activation. C) Confidence-based activation. All maps exhibited strong areas of consistency compared. Analysis was conducted on fMRI data smoothed with 5, 10, and 20 mm FWHM kernels. The 10 mm results are the same as in the main manuscript and are shown here for comparative purposes. Again, similar results are obtained for different levels of smoothing.

711  
712

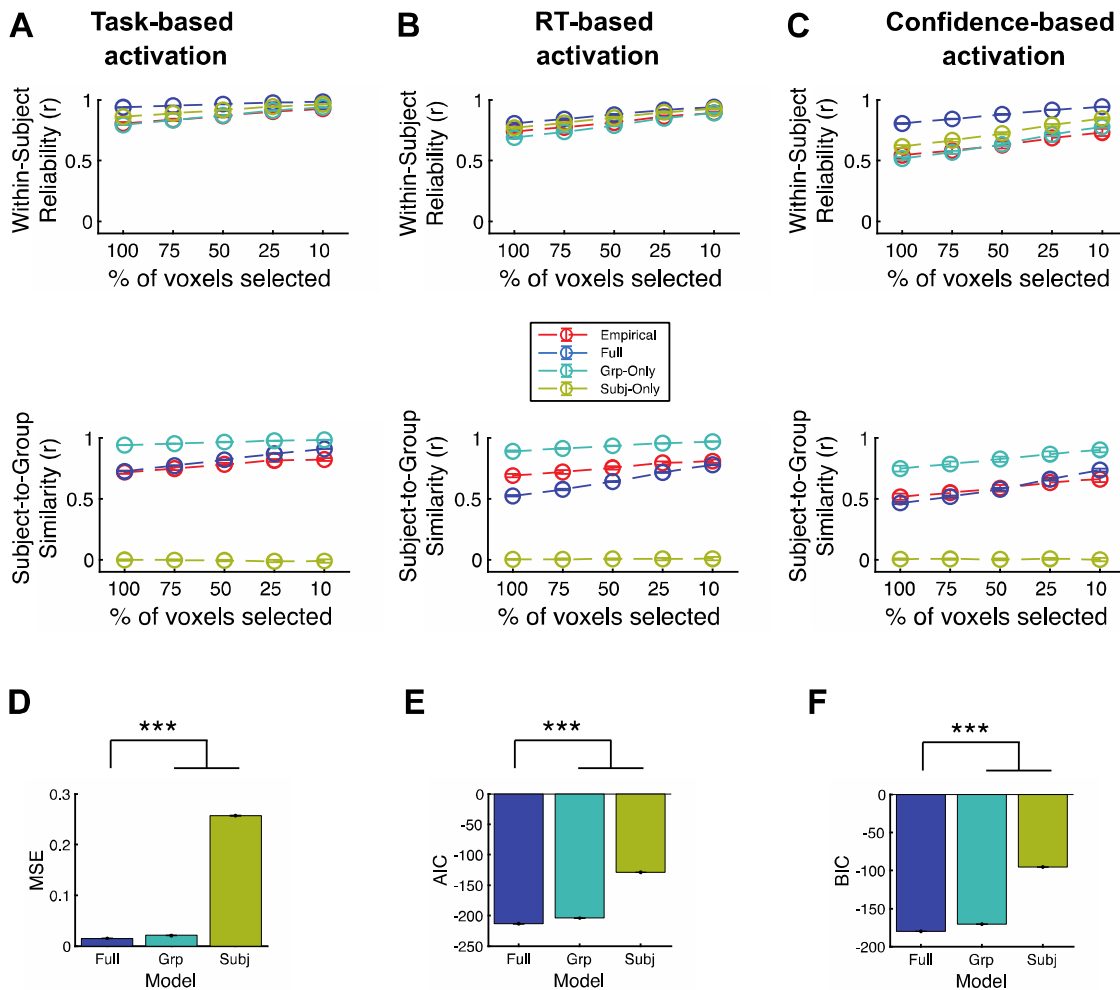

713  
714

715 **Fig S3. Comparing the Full, Subject-Only, and Group-Only models.** Sample within-  
716 subject reliability and subject-to-group similarity from the simulation using the Full,  
717 Subject-Only, and Group-Only factors in the simulation for (A) task-, (B) RT-, and (C)  
718 confidence-based activations. The full simulation model used subject-, group-, and noise-  
719 factors. The Subject-Only simulation model used subject and noise factors. The Group-  
720 Only simulation model used group and noise factors. (D-F) Model performance. The  
721 within-subject reliability and subject-to-group similarity values estimated in 25  
722 simulations, (D) the mean-squared error (MSE), (E) AIC, and (F) BIC were estimated by  
723 comparing the within-subject reliability and subject-to-group similarity from the  
724 simulation with the empirical values. The Full model outperformed both the Subject-Only  
725 and Group-Only models. Error bars show SEM. \*\*\* p < 0.001.

726



727

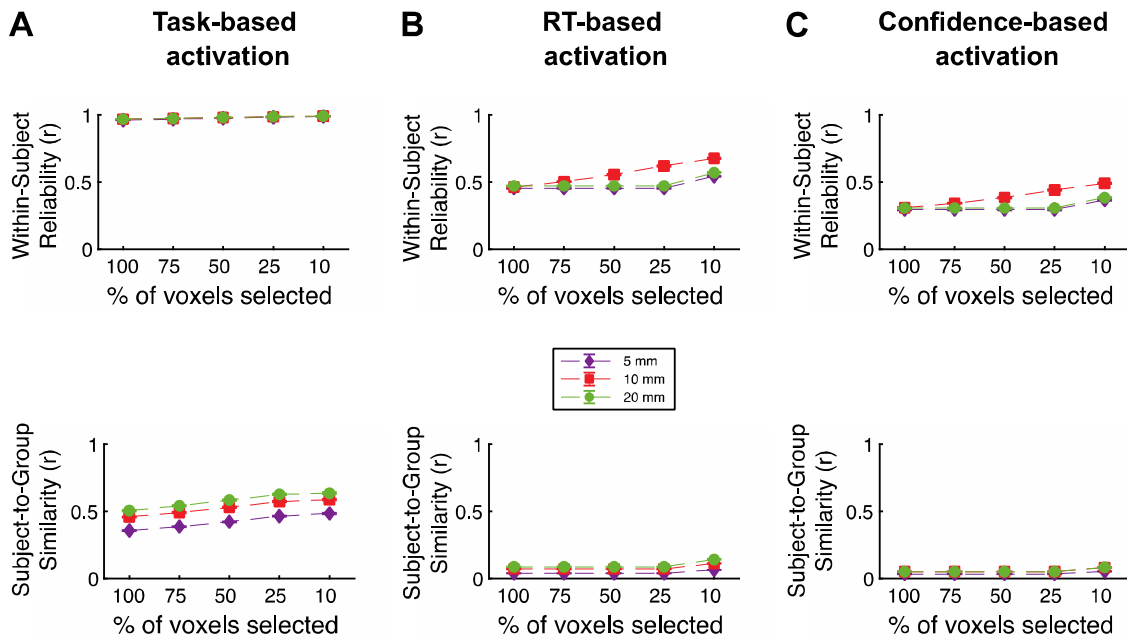

728

729

730

731

732

733

734

735

736

737

738

739

740

741

742

743

744

745

746

747

748

749

750

751

752

**Fig. S4. Within-subject reliability and subject-to-group similarity for analyses conducted at the block level.** Within-subject reliability and subject-to-group similarity values of the whole-brain maps produced by the (A) task-, (B) RT-, and (C) confidence-based analyses. We fit a general linear model (GLM) that allowed us to estimate the beta values for each voxel in the brain. For the block-analyses, the model consisted of regressors for each individual block (block onset was set to the beginning of fixation on the first trials and block offset was set to the confidence response of the last trial in the block), inter-block rest periods, as well as linear and squared regressors for six head movement (three translation and three rotation), five tissue-related regressors (gray matter, white matter, cerebrospinal fluid, soft tissues, and air and background), and a constant term per run. Two behavior-based analyses compared the beta values for blocks with faster- vs. slower-than-median average reaction times (RT) and higher- vs. lower-than-median average confidence. Within-subject reliability and subject-to-group similarity of the whole-brain maps produced by the task, RT, and confidence analyses was examined in the same manner as for the trial level analysis. The fMRI data were spatially smoothed with 5 mm, 10 mm, or 20 mm full width half maximum (FWHM) Gaussian kernel. As can be observed, very similar results are obtained for different levels of smoothing, indicating that the results obtained are likely due to large-scale rather than small-grained differences in the maps. Error bars show SEM.

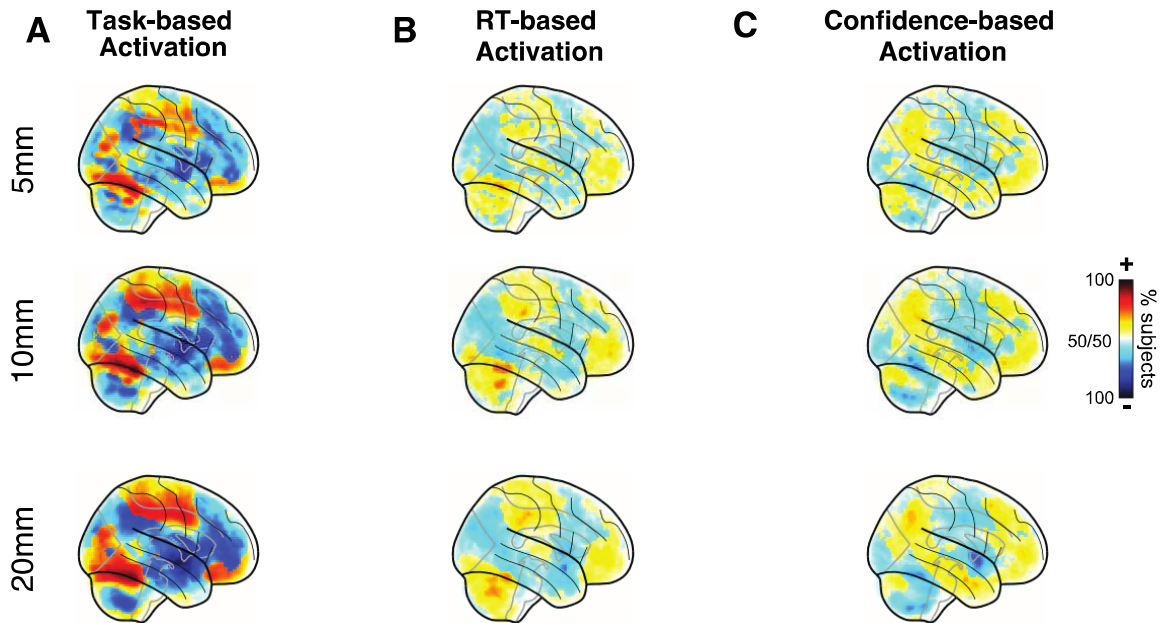

753

754

755

**Fig. S5. Block-level maps of voxel activation consistency across subjects.** A) Task-based activation. B) RT-based activation. C) Confidence-based activation. Task-based activations exhibited strong areas of consistency, but both the RT and confidence maps showed much weaker consistency across subjects. Analysis was conducted on fMRI data smoothed with 5, 10, and 20 mm FWHM kernels. Again, similar results are obtained for different levels of smoothing.

756

757

758

759

760

761

762



763

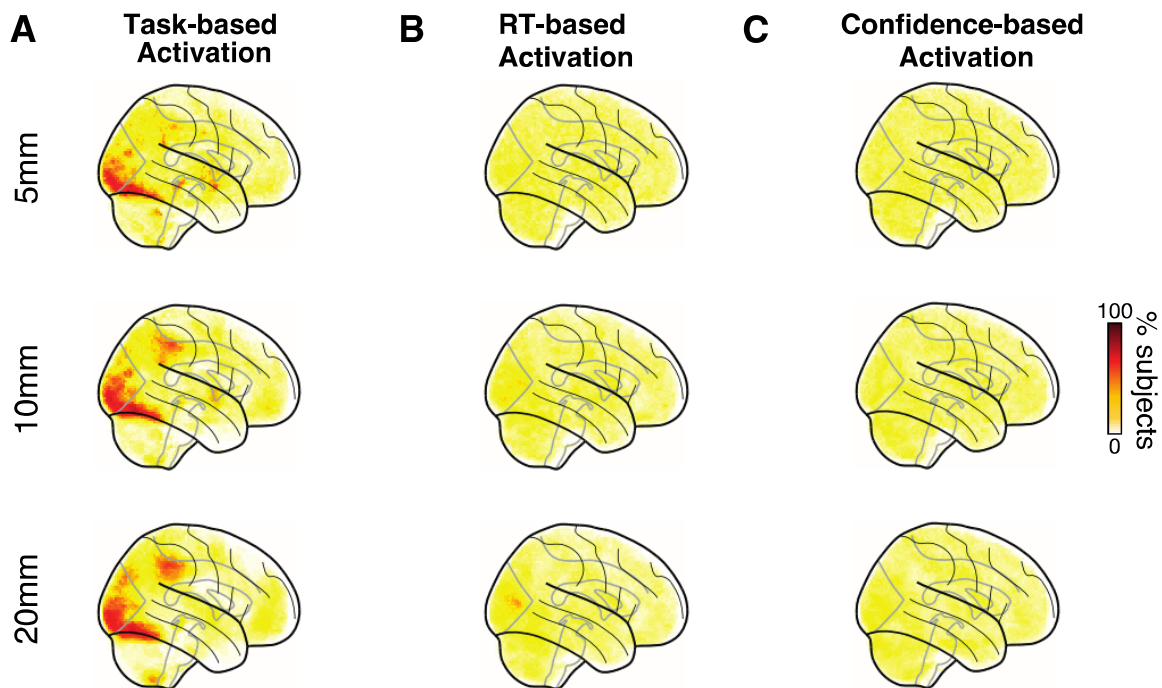

764

765 **Fig. S6. Block-level maps of the distribution of the top-10% most activated voxels.**  
766 A) Task-based activation. B) RT-based activation. C) Confidence-based activation. Task-  
767 based activations exhibited strong areas of consistency, but both the RT and confidence  
768 maps showed much weaker consistency across subjects. Analysis was conducted on  
769 fMRI data smoothed with 5, 10, and 20 mm FWHM kernels. Again, similar results are  
770 obtained for different levels of smoothing.  
771

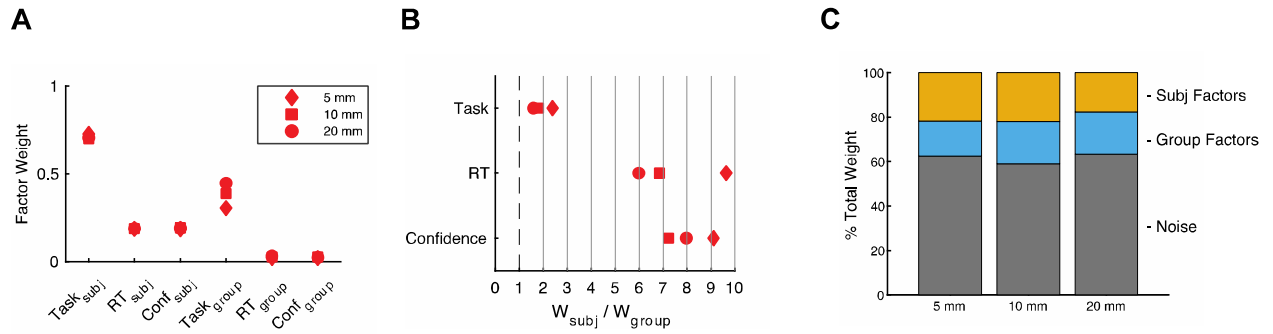

772

773

774 **Figure S7. Block-level model weights, ratios, and proportions.** A) Model weights.  
775 Subject- and group-level weights obtained from fitting the model separately to the data  
776 with each smoothing level. B) Weight ratios. Relative weights of the subject-level and  
777 corresponding group-level factors for each smoothing level. C) Factor proportions. The  
778 relative weight of subject, group, and noise factors contributing to the activation on an  
779 individual block. Subject and group factors reflect the summed task, RT, and confidence  
780 weights.

781

782

783

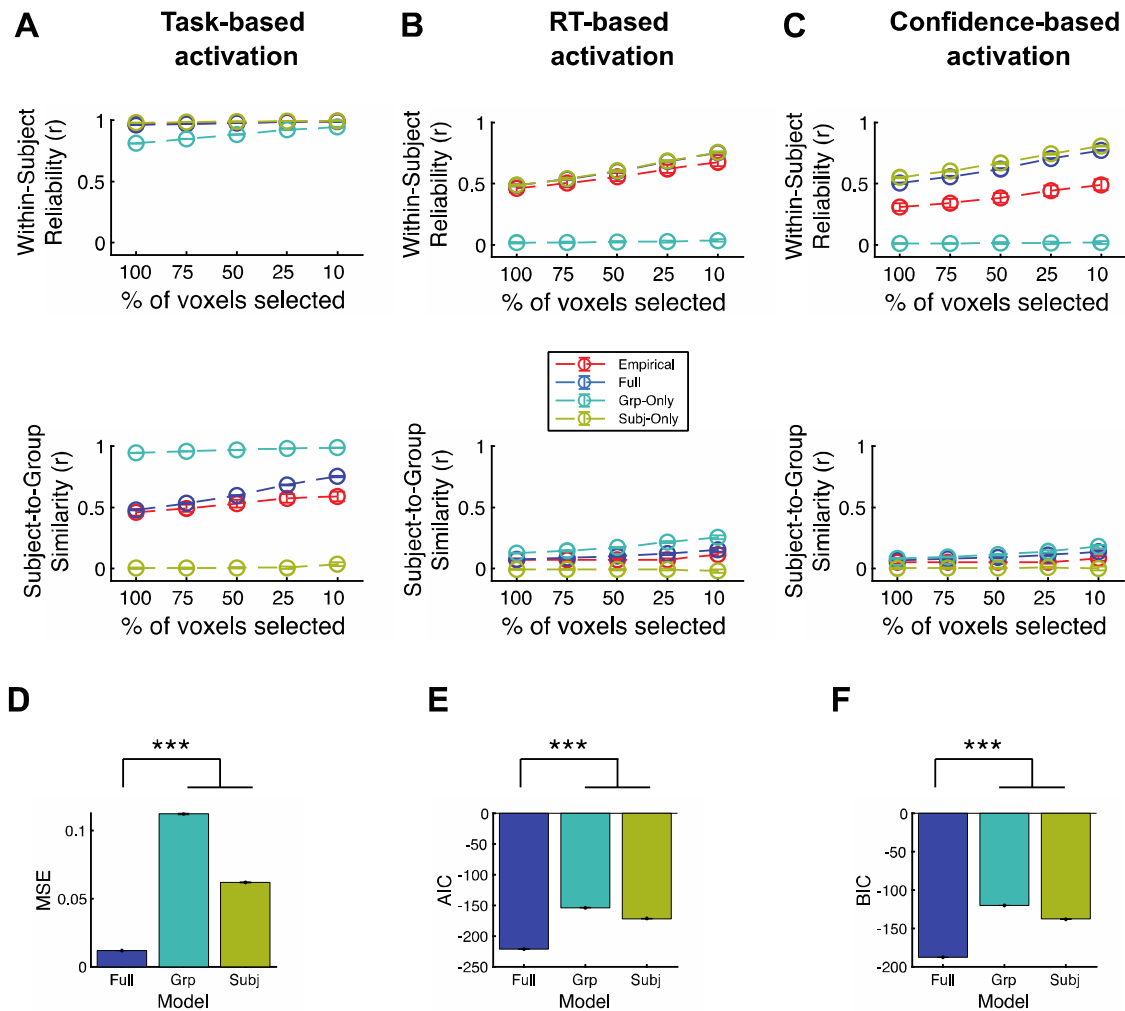

784

785 **Fig S8. Comparing the Full, Subject-Only, and Group-Only models for block-level**  
 786 **analysis.** Sample within-subject reliability and subject-to-group similarity from the  
 787 simulation using the Full, Subject-Only, and Group-Only factors in the simulation for (A)  
 788 task-, (B) RT-, and (C) confidence-based activations. The full simulation model used  
 789 subject-, group-, and noise-factors. The Subject-Only simulation model used subject and  
 790 noise factors. The Group-Only simulation model used group and noise factors. (D-F)  
 791 Model performance. The within-subject reliability and subject-to-group similarity values  
 792 estimated in 25 simulations, (D) the mean-squared error (MSE), (E) AIC, and (F) BIC  
 793 were estimated by comparing the within-subject reliability and subject-to-group  
 794 similarity from the simulation with the empirical values. The Full model outperformed  
 795 both the Subject-Only and Group-Only models. Error bars show SEM. \*\*\*  $p < 0.001$ .

796
